## 1                    **Improving root characterisation for genomic prediction in cassava**

2

3    **Bilan Omar Yonis<sup>1\*</sup>, Dunia Pino del Carpio<sup>2,5\*</sup>, Marnin Wolfe<sup>2</sup>, Jean-Luc Jannink<sup>2,3</sup>, Peter**  
4    **Kulakow<sup>4</sup>, Ismail Rabbi<sup>4</sup>**

5    <sup>1</sup> Montpellier SupAgro, 34060 Montpellier Cedex 02, France

6    <sup>2</sup> Department of Plant Breeding and Genetics, Cornell University, Ithaca NY 14850.

7    <sup>3</sup> US Department of Agriculture - Agricultural Research Service (USDA-ARS), Ithaca, NY.

8    <sup>4</sup> International Institute for Tropical Agriculture (IITA), Ibadan, Nigeria.

9    <sup>5</sup> Department of Jobs, Precincts and Regions, AgriBio, Centre for AgriBioscience, Bundoora,

10    Australia

11    \*equal contribution

12    Corresponding author to I.Rabbi@cgiar.org

13

### 14    **Abstract**

15    Cassava is widely cultivated due to its high drought tolerance and high carbohydrate-containing  
16    storage roots. The lack of uniformity and irregular shape of storage roots within and between  
17    genotypes poses significant constraints on harvesting and post-harvest processing. Routine  
18    assessment of storage root size and shape in breeding plots relies on visual scores.

19    Here, we phenotyped the Genetic gain and offspring (C1) populations from the International  
20    Institute of Tropical Agriculture (IITA) breeding program for root shape and size-related traits  
21    using image analysis of storage root photographs taken in the field.

22    In our study, using univariate genome-wide association analysis, we detected for most shape  
23    and size related traits, significant QTL regions located on chromosomes 1 and 12. The QTL  
24    region on chromosome 12 has been previously associated, using IITA breeding populations, to  
25    cassava mosaic disease (CMD) resistance.

26    Because the uniformity in size and shape of cassava roots is an important breeding goal, we  
27    calculated the standard deviation of individual root measurements per clone. The use of  
28    standard deviation measurements allowed the identification of new significant QTL for  
29    Perimeter, Feret and Aspect Ratio on chromosomes 6, 9 and 16. Using genomic prediction  
30    cross validation, the accuracies of root size and shape-related traits were lower than those  
31    previously reported for dry matter content (DM) and cassava mosaic virus resistance (CMD).  
32    Predictive accuracies of the mean values of root size and shape image-extracted traits were  
33    mostly higher than yield trait prediction accuracies in the C1 population. This study aimed to  
34    evaluate the feasibility of the image phenotyping protocol and to assess the use of genome-

35 wide analyses for size and shape image-extracted traits. The methodology described here and  
36 the results obtained in this study are promising and open up the opportunity to apply high-  
37 throughput methods in cassava.

38

39

## 40 **Introduction**

41 Cassava (*Manihot esculenta* Crantz), a tropical root crop with origins in Latin America, ranks  
42 as the 3rd most important crop in the tropics after rice and maize (Guira *et al.*, 2017). In Africa,  
43 more than 800 million people rely on cassava as a primary source of calories (Howeler *et al.*,  
44 2013). Cassava is widely cultivated due to its high drought tolerance and high carbohydrate-  
45 containing storage roots, and although most of the production is for human consumption, its  
46 use extends to animal feed and industrially processed products (Hahn, Reynolds and Egbunike,  
47 1992; Howeler *et al.*, 2013; Lukuyu *et al.*, 2014). In addition to the edible, high-starch storage  
48 roots, cassava plants produce thin fibrous roots, which function to absorb water and nutrients  
49 from the soil (Alves, 2002). The development and differentiation of fibrous roots, as well as  
50 the mechanism that triggers root storage formation in cassava, are poorly understood.

51 Cassava storage roots are morphologically diverse, the lack of uniformity and irregular shape  
52 between and within genotypes poses significant constraints on harvesting and post-harvest  
53 processing. The irregularity of root shape results in considerable losses of valuable root yield  
54 (Hahn, Reynolds and Egbunike, 1992). The waste of tuber flesh and the inefficiency of hand  
55 peeling could be avoided by peeling mechanization. However, breeding for root characteristics  
56 that facilitate this process requires a thorough understanding of the genetic basis of cassava  
57 root morphology. Several studies have attempted to characterize cassava root shape to support  
58 the development of peeling mechanization (Onwueme, 1978; Ejovo N. Ohwovoriolè *et al.*,  
59 1988). The root characteristics that were evaluated in those studies include root diameter,  
60 weight, length and peel thickness.

61

62 Routine assessment of storage root size and shape in breeding plots relies on visual scores  
63 ([www.cassavabase.org/search/traits](http://www.cassavabase.org/search/traits)). The categorical scores for root size are 3, 5 and 7 for  
64 small, medium and large roots, respectively. A single categorical score is given to a harvested  
65 plot based on the most frequent size in that plot. The visual rating of shape is 1 (conical), 2  
66 (conical-cylindrical), 3 (cylindrical), 4 (fusiform), 5 (Irregular), and 6 (Combination of shapes).  
67 Similar to root size, the shape scoring is based on the most common observation in a plot. These  
68 categorical scores suffer from person to person subjectivity and inability to describe the

69 variation in size and shape within a plot. Thus, image analysis of roots offers a more objective  
70 means of obtaining unbiased quantitative data on important root traits.

71

72 Image analysis software tools for high-throughput phenotyping have gained increased  
73 relevance due to the need in crop improvement to keep up with the advances in genotyping  
74 technologies (Furbank and Tester, 2011; Hartmann *et al.*, 2011; Fahlgren, Gehan and Baxter,  
75 2015). In Maize, imaging under controlled illumination followed by automatic image-analysis  
76 has been successfully used to study root system architecture traits (Colombi *et al.*, 2015). In  
77 cereals, grain shape is an important target for genetic improvement, because it is usually related  
78 to quality, consumer appeal or the intended end usage (Lestrel, 2011). For rice grain shape  
79 description, SHAPE, a program based on Elliptical Fourier Descriptor (EFDs) has been used  
80 to derive shape-related phenotypes for genome-wide association and genomic prediction (Iwata  
81 *et al.*, 2015b, 2015a).

82

83 Genomic selection (GS) is a method first introduced in animal breeding to select candidates for  
84 crossing in the breeding program using only genomic information. GS is particularly relevant  
85 for the improvement of polygenic traits (Heffner, Sorrells and Jannink, 2009) because its  
86 implementation can lead to a reduction in cost and time compared to traditional plant breeding  
87 programs (Jannink, Lorenz and Iwata, 2010). Because cassava is an outcrossing species mostly  
88 propagated by stem cuttings, conventional breeding methods can take more than five years to  
89 produce superior performing clones ([www.nextgencassava.org](http://www.nextgencassava.org)). Genome-wide association  
90 studies (GWAS) are complementary to GS as they have proven effective for the identification  
91 of QTL regions associated with several traits that are critical for cassava breeding, including  
92 cassava mosaic disease resistance (CMD) (Wolfe *et al.*, 2016), cassava brown streak disease  
93 resistance (CBSD) (Kayondo *et al.*, 2018), and beta-carotene content and dry matter content  
94 (Rabbi *et al.*, 2017).

95

96 In this study, size and shape related traits describing cassava roots were obtained through  
97 automated image analysis. We first estimated their heritability and conducted a genome-wide  
98 association study to explore the genetic architecture of cassava roots shape characteristics; then  
99 we compared the genomic prediction accuracy of image size and shape traits to those of root  
100 yield. Our research contributes to a better understanding of cassava root shape and explores the  
101 possibility of high-throughput phenotyping that would allow breeders to use GS to select  
102 varieties for quantitative root characteristics.

## 103 **Materials and methods**

### 104 **Germplasm**

105 We processed and analyzed cassava roots images taken from several field trials conducted by  
106 the International Institute for tropical agriculture (IITA) as part of their genomic selection  
107 breeding program. The cassava germplasm collections that we analyzed are known as Genetic  
108 Gain (GG) and the progeny of the first genomic selection event (C1), which are thus progeny  
109 of a subset of the GG population. The GG constitutes a large collection of important landraces,  
110 breeding lines and released improved varieties of cassava developed by IITA over the last four  
111 decades. More detail about the origins and constituency of these populations is available in  
112 several published studies (Wolfe *et al.*, 2016; Wolfe *et al.*, 2017).

113

114 A summary of the trials used in the present study is presented in Table 1. The first set of trial  
115 was the GG trial which comprised 805 plots planted in the summer of 2014 in Ubiaja, Nigeria  
116 using an augmented design with two checks planted in each incomplete block. The trial  
117 comprised of 758 unique clones. Each plot consisted of 10 stands in a single row with spacing  
118 of 1 m between rows and 0.8 m within rows. The second set of trials consisted of 88 clones  
119 selected from the GG population and planted as preliminary yield trial (PYT) across four  
120 locations (Ibadan, Ikenne, Ubiaja and Mokwa) using a randomized complete block design with  
121 two replicates. Plot size was similar to that of the GG trial. It is important to note here that  
122 these clones were used as parents for the GS cycle 1 population. The third set of trials involved  
123 GS cycle 1 clones that were split into three sets and planted separately in three locations:  
124 Ibadan, Ikenne and Mokwa. Each set was planted as a clonal evaluation trial (CET) using an  
125 incomplete block design with common checks in each block. All trials had at least 10 clones in  
126 common. Plants were harvested after 12 months in all trials.

127

128 **Table 1.** Summary of trials used in the present study including the trial names, design,  
129 locations, number of plots and number of unique clones in each trial.

| <i>Trial</i>        | <i>Design*</i> | <i>Location</i> | <i>Plots</i> | <i>Unique entries</i> | <i>Plot size</i>      |
|---------------------|----------------|-----------------|--------------|-----------------------|-----------------------|
| <i>GG.C0.UBJ</i>    | CET, augmented | Ubiaja          | 805          | 738                   | 10 plants, single row |
| <i>GS.C1.EC.IBA</i> | CET, augmented | Ibadan          | 293          | 265                   | 20 plants (4 x 5)     |
| <i>GS.C1.EC.IKN</i> | CET, augmented | Ikenne          | 331          | 307                   | 20 plants (4x5)       |

|                                     |                |        |     |     |                    |
|-------------------------------------|----------------|--------|-----|-----|--------------------|
| <i>GS.CI.EC.MOK</i>                 | CET, augmented | Mokwa  | 329 | 278 | 20 plants<br>(4x5) |
| <i>Crossing<br/>block.C0 CI.UBJ</i> | CET augmented  | Ubiaja | 243 | 218 |                    |

130 \* CET = clonal evaluation trial

131

## 132 **Image acquisition**

133 The roots from four plants per plot were spread across a green board (160 cm by 120 cm). It  
134 was important that the roots were not touching each other and also not touching the board edges  
135 to get an individual root value (Supplementary Figure 1). Five circles, each 7.5 cm in diameter  
136 were painted on the left and right sides of the board. Those circles were used as a reference to  
137 transform the final result from the pixel unit to cm. Labels were placed on the board for each  
138 image allowing images to be identified and renamed for further processing.

139

## 140 **Image processing and phenotype acquisition**

141 First, the images were coded to assign each photo to the plot from which the roots were taken.  
142 In some cases, several images were required per plot, to capture all roots from all the plants.  
143 For the GG collection, after quality control we obtained 805 images of cassava roots for 738  
144 clones of which 665 had genotypic information. For the C1 population, we had images  
145 originating from four locations and a total of 1091 root images for 997 clones. All the image  
146 processing was performed with ImageJ Java version 1.8.0\_11 (64-bit). The images were copied  
147 in two folders, one for processing and measuring the roots and the second for scaling the  
148 measurements. Thus, each image was processed and analysed twice.

149

## 150 **Image processing**

151 The first step of the image processing was to convert our RGB colour images into HSB stacks  
152 (hue, saturation and brightness images). We obtained three slices, but we only kept the first  
153 slice (the hue image). We then set a threshold from 0 to 255 for the roots and from 125 to 255  
154 for the reference scaling circles before proceeding to run the “threshold” followed by the “make  
155 binary” commands. This threshold was determined by doing individual tests on some images.  
156 At the end of the processing, each image was binary, with our objects of interest (roots and  
157 scales) represented as white pixels and everything else as black. Most steps in the procedure  
158 were automated using customized ImageJ macros.

159

## 160 ***Phenotypes acquisition and description***

161 The “analyze particles” command in ImageJ counts each contiguous area of white pixels within  
162 a binary image and gives some additional basic measurements. With the aim to get shape  
163 related traits, we used the “extended particle analyzer” function in the BioVoxel Toolbox  
164 plugin ([http://imagej.net/BioVoxel\\_Toolbox#Extended\\_Particle\\_Analyzer](http://imagej.net/BioVoxel_Toolbox#Extended_Particle_Analyzer)). This function  
165 computes useful parameters of which we chose to keep seven for downstream analysis: Area,  
166 Perimeter, Feret, Circularity, Solidity, Roundness, and the Aspect Ratio (AR). The area and  
167 the perimeter describe the size of a root. The Feret, is the longest distance between any two  
168 points along the selection boundary, also known as maximum caliper. Circularity, Solidity,  
169 Roundness and aspect ratio (AR) describe shape.

170 The shape descriptors are ratio values that ranged from 0 to 1 except AR, which is not bounded.  
171 In addition, the shape descriptors do not have a unit, while area, perimeter, and feret are  
172 parameters expressed in pixels. The mean area value of the circles was used as a reference to  
173 convert pixels to centimetres (scaling coefficient). Since the exact diameter in centimetres of  
174 each circle was known, we used this value to calculate the mean number of pixels per cm<sup>2</sup> for  
175 each image.

176

$$177 \text{Scaling coefficient} = \sqrt{(\text{Area (pixel}^2)/\text{Area (cm}^2))}$$

178

## 179 **Genomic analyses**

180 We performed a two-step approach for the genomic analysis. In the first step, we used a linear  
181 mixed model to account for the variability in the field design and calculate the broad-sense  
182 heritability. The input data was: 1) the mean phenotype value for each plot (average phenotype  
183 of all imaged roots), 2) the same as (1) but adjusted to account for the potential effects of  
184 variation in cassava mosaic disease (CMD) severity among plots and 3) the standard deviation  
185 of the root shape and size measurements (across all imaged roots) per plot, also adjusted to  
186 remove the effect of CMD. We fit two different models, with CMD correction and without  
187 CMD correction, for each of the two focal populations (GG or C1).

188

189 For GG, the following models were fitted:

$$190 (1) \mathbf{y} = \mathbf{Xm} + \mathbf{Z}_{\text{clone}}\mathbf{c} + \mathbf{Z}_{\text{range}}\mathbf{r} + \varepsilon$$

191

$$192 (2) \mathbf{y} = \mathbf{Xn} + \mathbf{Z}_{\text{clone}}\mathbf{c} + \mathbf{Z}_{\text{range}}\mathbf{r} + \varepsilon$$

193

194 In both models  $\mathbf{y}$  is a vector of phenotypes,  $\mathbf{Z}_{\text{clone}}$  and  $\mathbf{Z}_{\text{range}}$  are respectively the incidence  
195 matrices of the clones and range both fit as random with their effects vector  $c \sim N(0, \mathbf{I}\sigma_c^2)$  for  
196 clones and  $r \sim N(0, \mathbf{I}\sigma_r^2)$  for range.  $\mathbf{X}$  is the incidence matrix for the fixed effects. In model 1,  
197 the number of harvested plants per plot (NOHAV) and CMD were accounted for as fixed and  
198 the vector  $m$  contains the effect estimates. In model 2, we did not correct for CMD,  $\mathbf{X}$  and  $n$   
199 therefore only reference NOHAV.

200

201 For C1, model (3) and (4) were fitted:

$$202 \quad (3) \mathbf{y} = \mathbf{X}m + \mathbf{Z}_{\text{clone}}c + \mathbf{Z}_{\text{loc:range}}r + \varepsilon$$

$$203 \quad (4) \mathbf{y} = \mathbf{X}n + \mathbf{Z}_{\text{clone}}c + \mathbf{Z}_{\text{loc:range}}r + \varepsilon$$

204 In model (3) and (4), we replace the range variable with the combination of the location and  
205 the range (Loc:range, i.e. range is nested in location) as the C1 population was planted in  
206 several locations unlike the GG. In all models, for all traits,  $\mathbf{y}$  corresponded to the log  
207 transformation of the original phenotypic values. Additional explanation of the models fitted  
208 for these populations can be found in Wolfe et al. (2017).

209

210 From these models, we extracted the clone-effect BLUP, which estimates the total genetic  
211 value (EGV) of each line and de-regressed the EGV by dividing them by their reliability to  
212 obtain the de-regressed BLUP. Broad-sense heritability values were calculated using the  
213 variance components estimated using the mixed-models described above. EGV and de-  
214 regressed EGV are used in downstream analyses as described below.

215

## 216 **Genotyping data**

217 Both populations (GG and C1) were genotyped using the genotyping-by-sequencing (GBS)  
218 method (Elshire *et al.*, 2011). TASSEL 5.0 GBS pipeline v2 (Glaubitz *et al.*, 2014) was used  
219 for SNP calling. Alignment of GBS reads was to the cassava reference genome v6.1  
220 (<http://phytozome.jgi.doe.gov>; ICGMC, 2015). The condition for the genotype calls was the  
221 presence of a minimum of four reads. Extracted SNPs were filtered to remove clones with  
222 >80% missing and markers with >60% missing genotype calls. Markers were also removed  
223 when they had an extreme deviation from Hardy-Weinberg equilibrium ( $\chi^2 > 20$ ).

224 A combination of custom scripts and common variant call file (VCF); manipulation tools were  
225 used to accomplish the above pipeline. The missing data were imputed using Beagle v4.0

226 (Browning and Browning, 2016). For the GG and C1 populations, we had 112,082 and 179,041  
227 markers, respectively, with  $MAF > 0.01$ .

228

## 229 **Genomic prediction**

230 We estimated genomic prediction accuracy using 5-fold cross-validation repeated 25 times  
231 similar to what is described in Wolfe et al. (2017). Briefly, the for each replicate of the process,  
232 the population was split into five approximately equal chunks (folds). Five genomic predictions  
233 were then made in which each fold (fifth of the population) in turn served as the test set (no  
234 phenotypes) and were predicted by the remaining four-fifths (training set, with phenotypes).  
235 Prediction accuracy for each fold was defined as the correlation of the genome-estimated  
236 breeding values (GEBVs, which are BLUPs from the test-sets of each fold), with the de-  
237 regressed EGVs from the pre-adjustment stage of the analysis.

238

239 For genomic prediction, we used a mixed-model with a genotype (clone) random effect with  
240 covariance proportional to the genomic relationship matrix, also called GBLUP. The genomic  
241 relationship matrix was constructed using the function *A.mat* in the R package rrBLUP  
242 (Endelman, 2011; Endelman and Jannink, 2012) De-regressed BLUPs were used as the  
243 response variable and the GBLUP models were fit with the function *emmreml* in the R package  
244 EMMREML (Akdemir and Okeke, 2015).

245

## 246 **GWAS analyses**

247 Genome-wide association mapping (GWAS) analyses were performed using a linear mixed-  
248 model analysis (MLMA) implemented in GCTA (Version 1.90.0beta) (Yang *et al.*, 2011).  
249 Specifically, we followed a leave-one-chromosome-out approach and tested all markers with  
250  $MAF > 0.05$ . The leave-one-chromosome-out approach involves excluding all markers on the  
251 chromosome of the current candidate SNP from the genomic relationship matrix (GRM) used  
252 to control population structure when estimating their marker effects. Manhattan plots were  
253 generated using the R package *qqman* (Turner, 2014) with a Bonferroni threshold of 6.28.

254

255 Candidate gene identification was performed using the significant GWAS results of the  
256 standard deviation + CMD correction GWAS results. Using the phytozome 12 portal link to  
257 biomart (<https://phytozome.jgi.doe.gov/biomart/>) we searched for genes located 10kb around  
258 the top SNP hits.

259



## 260 **Multivariate GWAS analysis**

261 We used a multivariate linear mixed model as implemented in GEMMA (mvLMM) (Zhou and  
262 Stephens, 2014). We tested marker associations with multiple phenotypes that are fitted jointly  
263 in the mvLMM while controlling for population stratification. Different combinations of  
264 phenotypes were fitted in six models, the phenotypes that were fitted together were selected  
265 based on their phenotypic correlation. Model 1: Circularity, Round, Solidity; Model 2: Area,  
266 Feret, Circularity, Solidity, AR; Model 3: Area, Perimeter, Round, Solidity, AR; Model 4:  
267 Area, Perimeter, Feret, Circularity, Round, Solidity, AR; Model 5: Area, Perimeter, Feret;  
268 Model 6: Circularity, Round, Solidity, AR.

269

## 270 **Results**

### 271 **Phenotypes distribution**

272 Using the plugin BioVoxel in ImageJ, we extracted quantitative measurements of the Area,  
273 Perimeter, Feret, Circularity, Solidity, Roundness, and the aspect ratio (AR) from root images  
274 collected in the field. The raw value datasets show similar ranges for root shape and size  
275 descriptors in GG and C1 populations (Supplementary Table 1). The individual root  
276 measurements with the maximum and minimum value of each trait in both populations are  
277 presented in Figure 1.

278 The frequency distribution of the mean value per plot of the GG and C1 populations is  
279 presented in Supplementary Figure 2 and the mean values per trait within population are  
280 presented in Supplementary Table 1. Some genotypes exhibited large differences in their mean  
281 values for Area, Perimeter and Feret. For example, the maximum mean root Area in GG  
282 population was 339 cm<sup>2</sup> while the mean Area of the GG population was 121.5 cm<sup>2</sup>. Similarly,  
283 those genotypes exhibited a maximum mean root Perimeter of 135 cm and a maximum mean  
284 Feret of 50 cm while the mean Perimeter and Feret value in the GG population were 66 cm and  
285 26 cm, respectively.

286 In the C1 dataset, the maximum mean value for the root area in the C1 dataset was 372 cm<sup>2</sup>,  
287 while the mean area of that population was 128 cm<sup>2</sup>. The maximum values for Perimeter and  
288 Feret were 132 and 49 cm while the C1 population mean value for the two traits was 68 cm  
289 and 28 cm respectively.

290

291

292

## 293 **Correlation plots**

294 Phenotypic correlations were calculated pairwise using de-regressed BLUPs of the mean values  
295 for each population separately (Figure 2). In the GG dataset, the highest correlation within yield  
296 traits corresponded to root number and root weight ( $r^2=0.79$ ). Similarly, root number and root  
297 weight were highly correlated in C1 population ( $r^2=0.88$ ). In both datasets, correlations  
298 between yield traits were significant and high ( $r^2 > 0.5$ ) and these traits were also positively  
299 correlated with Area, Perimeter and Feret. However, a low correlation ( $r^2 < 0.1$ ) was observed  
300 between yield traits and root shape descriptors such as Circularity, Roundness, Solidity and  
301 AR in both populations.

302

303 Size-related traits derived from root images (Area, Perimeter and Feret) showed the highest  
304 positive correlation ( $r > 0.7$ ) with each other. In both datasets, the highest correlation between  
305 size-related traits corresponded to Perimeter and Feret ( $r=0.97$ ). Additionally, Feret and  
306 Perimeter were negatively correlated with shape-related traits (Circularity, Roundness and  
307 Solidity) and positively correlated with AR. In the GG dataset, Area showed a negative  
308 correlation with Circularity ( $r= -0.26$ ), Roundness ( $r= -0.21$ ), Solidity ( $r= -0.19$ ), and a positive  
309 correlation with AR ( $r= 0.19$ ). While in the C1 population, a low correlation was observed  
310 between Area and shape descriptors.

311 Within the shape related traits, the highest correlation was found between Circularity and  
312 Roundness (GG  $r = 0.89$ , C1  $r = 0.86$ ) and Solidity (GG  $r = 0.87$ , C1  $r = 0.84$ ). AR showed a  
313 negative correlation with Circularity, Solidity and Roundness in both datasets.

314

## 315 **Broad-sense heritability**

316 Broad-sense heritability values ( $H^2$ ) for root shape and yield-related traits were calculated for  
317 each population (Table 2). In the GG population, without adjusting the phenotypes for their  
318 CMD score,  $H^2$  of root shape related traits ranged from 0.17 (Perimeter and Circularity) to 0.46  
319 (aspect ratio) and for yield traits,  $H^2$  ranged from 0.29 root weight (RTWT) to 0.44 shoot weight  
320 (SHTWT). In the GG dataset, Perimeter, Circularity and Solidity exhibited the lowest  
321 heritability values at 0.17, 0.17 and 0.12, respectively.

322

323 In the C1 population, the heritability of shape-related traits ranged from 0.36 (Perimeter) to  
324 0.54 (Circularity) while for yield traits  $H^2$  ranged from 0.36 (SHTWT) to 0.61 (RTWT). The  
325 heritability of most traits was higher in the C1 population than GG except for Area (0.39 to

326 0.38) and SHTWT (0.44 to 0.36). The inclusion of the CMD in the calculation of the variance  
327 components always reduced the heritability of all the traits in both populations by around 10%.

328

### 329 **Genome-wide association study of root traits**

330 Using a univariate genome-wide association approach for root image traits (root size and shape)  
331 and root yield traits we identified significant loci for all traits except for area (Figure 3). We  
332 detected a total of 91 SNP markers exceeding the significance threshold ( $-\log_{10} P \geq 6.28$ ).  
333 The Manhattan plots of the univariate GWAS results for yield traits are shown in  
334 Supplementary Figure 3 and detailed information on the significant markers is summarized in  
335 Supplementary Table 2.

336 We detected markers associated with Perimeter and Feret on chromosome 12, and with Solidity  
337 on chromosome 1, whereas for AR we identified significant loci on chromosome 1 and  
338 chromosome 12. Similarly, for Circularity and Roundness, we detected significant loci on  
339 chromosome 1 and chromosome 12.

340 For most shape-related traits several other regions on chromosomes 3, 4, 8, 9, 14, 15 and 18  
341 did not reach the significance threshold but showed a  $-\log_{10} P \geq 5$  (Figure 3). For root yield  
342 traits we detected a QTL on chromosome 12 associated to root number (RTNO) and RTWT  
343 (Supplementary Figure 3, Supplementary Table 2). Notably, using the CMD adjusted  
344 phenotype removed the significance of the QTL on chromosome 12 but did not identify new  
345 QTL for the image traits shape phenotypes (Supplementary Figure 4) it detected new loci  
346 associated with root number and shoot weight (Supplementary Table 3).

347 Significant SNP markers ( $-\log_{10} P \geq 6.28$ ) were detected for the standard deviation-derived  
348 traits of Perimeter (per-sd), Feret (feret-sd) and Aspect Ratio (AR-sd) (Figure 4). For per-sd, a  
349 significant QTL was detected on chromosome 16, though it was not observed in the GWAS  
350 model with the mean values nor in the GWAS model with mean values with CMD adjusted  
351 phenotypes. For feret-sd, two significant QTL were identified, one on chromosome 9 and one  
352 on chromosome 6 and for AR-sd one significant QTL was found on chromosome 8  
353 (Supplementary Table 4).

354 Different markers were significant in the multivariate GWAS model dependent on which  
355 phenotypes were included in the multivariate linear mixed model (mvLMM). Although the  
356 multivariate model can increase the power for detecting pleiotropic variants when using  
357 correlated traits, we identified few significant markers above the Bonferroni threshold  
358 (Supplementary Fig 5-10). Nonetheless, when P-values were corrected for multiple testing by  
359 computing Benjamini-Hochberg q-values, four SNPs were identified as significant in the

360 multivariate analysis. In the multivariate analysis using Area, Perimeter, Feret, Circularity,  
361 Round, Solidity and AR in the mvLMM (Model 4) we identified a significant marker at the  
362 same location on chromosome 4 (Supplementary figure 8). Similarly, using model 6  
363 (Circularity, Round, Solidity, Aspect ratio) we identified one significant marker located on  
364 chromosome 4 (Supplementary figure 10). When Area, Perimeter and Feret were included in  
365 the mvLMM (model 5) we identified significant markers on chromosomes 6 and 9 using a q-  
366 value threshold of  $< 0.1$  (Supplementary figure 9).

367

### 368 **Genomic prediction**

369 Using the parental (GG) and offspring generation (C1) datasets independently, we calculated  
370 the prediction accuracies of size and shape image traits and compared those to root yield traits  
371 accuracies using de-regressed BLUPs of 1) the mean phenotype value (average phenotype of  
372 4 plants) (Figure 5, Supplementary table 5), 2) the mean root size and shape phenotypes  
373 adjusted to account for the potential effect of cassava mosaic disease (CMD) on these traits  
374 (Figure 6, Supplementary Table 5) and 3) the standard deviation of the root shape and size  
375 measurements adjusted to remove the effect of CMD (Figure 6, Supplementary Table 5).

376 Prediction accuracy, calculated as the correlation between the genome estimated breeding  
377 values (GEBVs) and the de-regressed BLUPs of the mean phenotype value, ranged from 0.32  
378 (SHTWT) to 0.43 (RTNO) in the GG population and from 0.12 (RTNO) to 0.46 (AR) in the  
379 C1. For yield traits, accuracies in GG were higher than in C1 but were not different between  
380 populations for the shape and size related traits. In the GG population, the shape descriptors  
381 Circularity (mean = 0.40), Roundness (mean=0.39), Solidity (mean =0.37) and AR (mean  
382 =0.38) showed slightly higher accuracies than the size descriptors Area (mean =0.33),  
383 Perimeter (mean = 0.34) and Feret (mean = 0.33). In the C1 population, size and shape image  
384 traits exhibited a higher prediction accuracy than root yield traits. Among the size descriptors,  
385 Feret showed the highest accuracy (mean=0.34) and Area the lowest (mean=0.29). Among  
386 shape descriptors, AR showed the highest predictive value (mean=0.46) and Solidity the lowest  
387 (mean=0.33) (Supplementary Table 5). When the mean root size and shape phenotypes were  
388 adjusted to account for the effect of CMD, we observed a minimal decrease in predictive  
389 accuracy (Supplementary Table 5). A lower predictive accuracy was obtained for standard  
390 deviation of size and shape traits adjusted for CMD, in both populations. In the GG population,  
391 the decrease was pronounced with a maximum reduction of up to 55% for root perimeter (0.27  
392 mean to 0.12 CMD adjusted) while in the C1 population the largest reduction was of 73% for  
393 circularity (0.41 mean to 0.11 CMD adjusted) (Supplementary Table 5).

## 394 **Discussion**

395 Root number and root weight are among the most important targets for improvement in cassava  
396 breeding programs. Although cassava root characterisation has been the subject of several  
397 studies (Adetan, Adekoya and Aluko, 2003; Padonou, Mestres and Nago, 2005; Anggraini *et*  
398 *al.*, 2009), the genetic architecture underlying cassava root shape remains unexplored. This  
399 study aimed to evaluate the feasibility of the image phenotyping protocol and to assess the use  
400 of genome-wide analyses for size and shape image-extracted traits.

401 Here, we phenotyped the GG and C1 populations from the International Institute of Tropical  
402 Agriculture (IITA) breeding program for root shape and size-related traits using image analysis  
403 of storage root photographs taken in the field. In both populations, the storage roots exhibited  
404 a wide range of shape variation. Root-size related traits (Area, Perimeter and Feret) obtained  
405 through image analysis showed significant but low correlation ( $r \leq 0.5$ ) with cassava root yield  
406 components (RTNO, RTWT). Roots with a large area were generally heavier and the circularity  
407 of storage roots was mostly inversely correlated to its area. These results, suggest that rounded-  
408 shaped roots in cassava are generally smaller and hence lighter in weight. More importantly,  
409 the lack of correlation between size-related traits and shape related traits increases the interest  
410 in shape related traits as a target for selection.

411

412 In radish, rice and wheat, imaging-based studies of root shape and size traits have demonstrated  
413 first, that these have different genetic architectures (Iwata *et al.*, 2000) and second, that shape  
414 phenotyping can aid the identification of pleiotropic QTL. In our study, using univariate  
415 genome-wide association analysis, we detected for most shape and size related traits,  
416 significant QTL regions located on chromosomes 1 and 12. The QTL region on chromosome  
417 1 has been previously shown to be segregating for an introgressed segment from *M. glaziovii*  
418 (Bredeson *et al.*, 2016). Furthermore, the QTL region on chromosome 1 has been associated,  
419 in the IITA genetic gain population, with other root traits such as dry matter and total carotenoid  
420 content (Rabbi *et al.*, 2017).

421 For root weight and root number, we identified a significant QTL associated with those traits  
422 on chromosome 12. The QTL region on chromosome 12 has been previously associated, using  
423 IITA breeding populations, to cassava mosaic disease (CMD) resistance (Wolfe *et al.*, 2016).  
424 The effect of cassava mosaic disease (CMD) on root yield has been previously investigated in  
425 fully and partly infected stands of cassava (Seif, 1982; Otim-Nape, Thresh and Shaw, 1997;  
426 Owor *et al.*, 2004). In those studies, fresh stem, leaf and root yields and the number of tuberous

427 roots were influenced by the health status of the plants harvested and that of their nearest  
428 neighbours. In our study, when we adjusted the size and shape phenotypes according to their  
429 CMD score we did not identify new QTL but a reduction in marker significance, which suggest  
430 that the CMD2 locus in chromosome 12 does not participate in the regulation of size and shape  
431 phenotypes. Nonetheless, the identification of new QTL for root number and shoot weight,  
432 when these traits were adjusted according to the CMD score, support the notion that CMD can  
433 have an effect on root yield traits.

434 Because the uniformity in size and shape of cassava roots is an important breeding goal we  
435 calculated the standard deviation of individual root measurements per clone. The use of  
436 standard deviation measurements allowed the identification of new significant QTL for  
437 Perimeter, Feret and Aspect Ratio on chromosomes 6, 9 and 16. For the new QTL regions  
438 located on chromosomes 9 and 16 we identified candidate genes related to the tocopherol and  
439 carotenoids pathways which are known regulators of plant development (Nisar *et al.*, 2015)  
440 (Supplementary table 6). On chromosome 6, the most promising candidate is  
441 Manes.06G078700 a root meristem growth factor 1 related gene.

442 Together our GWAS results suggest that 1) root-related traits have in common the genetic  
443 control under few large effect loci and many small effect loci, 2) a possible correlation between  
444 disease severity and yield loss and, 3) that introgressed regions contain gene clusters which  
445 control root yield and root size/shape traits.

446 To increase the power of our study and to detect pleiotropic loci for size and shape traits (Korol  
447 *et al.*, 2001; Korte *et al.*, 2012), we used a multivariate linear mixed model approach which  
448 included groups of correlated root size and root size/shape traits. Considering multiple  
449 phenotypes in the mvLMM enabled us to identify new candidate loci on chromosomes 4, 6 and  
450 9 that were not identified in the univariate analyses.

451  
452 The potential of GS as a breeding tool to increase the rates of genetic gain was recently tested  
453 in three Next Generation Cassava Breeding programs (Marnin D. Wolfe *et al.*, 2017). The study  
454 showed promising results particularly for traits with consistent heritability values across  
455 programs and stable large-effect quantitative trait loci. Prediction accuracies for RTNO, RTWT  
456 and SHTWT were similar with those reported in previous cassava cross-validation analyses (  
457 Wolfe *et al.*, 2017). Root size and shape-related trait accuracies were lower than those reported  
458 for dry matter content (DM) and cassava mosaic virus resistance (CMD) (Wolfe *et al.*, 2017).  
459

460 Although the heritability of yield traits was higher in the offspring (Cycle 1, C1) than the  
461 parental generation (Genetic Gain, GG), the predictive accuracy of traits extracted from root  
462 images showed intermediate to high values in both populations. However, the C1 yield traits  
463 accuracies being lower than the GG, suggests that because the C1 had been selected strongly  
464 for these yield traits, its variance was diminished.

465

466 Nonetheless, predictive accuracies of the mean values of root size and shape image-extracted  
467 traits were mostly higher than yield trait prediction accuracies in the C1 population. Adjusting  
468 the mean and standard deviation phenotypes for the effect of CMD reduced the predictive  
469 accuracy. However, that correction is necessary to unlink the effect of CMD from the causal  
470 loci that are responsible for the regulation size and shape root traits.

471

472 Although these measurements were laborious in the field and not high-throughput, the analyses  
473 of the images are automated and quantitative, they avoid subjectivity in scoring and other  
474 human-errors and most importantly, they improve cassava root characterisation. The  
475 methodology described here and the results obtained in this study are promising and open up  
476 the opportunity to apply high-throughput methods in cassava. The image capture and analysis  
477 can now be performed using the OneKK (one thousand kernels) app  
478 (<https://github.com/PhenoApps/OneKK>), an inexpensive and user-friendly tool for automated  
479 measurement of seed size, shape, and weight using smart phones. The app is developed under  
480 the BREAD PhenoApps project and supported by the National Science Foundation. Still, there  
481 is a need to explore the use of image-based phenotyping in multiple environments to estimate  
482 the effect of the environment on root shape related traits and to automate the collection of root  
483 images in the field further.

484

485 **Acknowledgements**

486 This research was supported by the Bill & Melinda Gates Foundation and the Department for  
487 International Development of the United Kingdom through the “Next Generation Cassava  
488 Breeding Project”, and CGIAR-Research Program on Roots, Tubers and Bananas. The  
489 authors acknowledge the support of Andrew Smith Ikpan, Ogunpaimo Kayode and Cynthia  
490 Idhigu in acquiring the root images. We also acknowledge the PhenoApp project led by Jesse  
491 Poland, Kansas State University, for technical support in image-based phenotyping using  
492 their OneKK (one thousand kernel) application.

493

494 **Competing interests**

495 **The author(s) declare no competing interests.**

496

497

498

499

500

501

502

503

504

505

506

507

508

509

510



511 **Figures and tables**

|              | GG min                                                                                                     | GG max                                                                                                      | C1 min                                                                                                     | C1 max                                                                                                         |
|--------------|------------------------------------------------------------------------------------------------------------|-------------------------------------------------------------------------------------------------------------|------------------------------------------------------------------------------------------------------------|----------------------------------------------------------------------------------------------------------------|
| AREA         | <br>10.25 cm <sup>2</sup> | <br>717.47 cm <sup>2</sup> | <br>7.540 cm <sup>2</sup> | <br>738.559 cm <sup>2</sup> |
| PERIMETER    | <br>12.86 cm              | <br>334.97 cm              | <br>12.272 cm             | <br>228.268 cm              |
| FERET        | <br>4.54 cm               | <br>86.51 cm               | <br>4.492 cm              | <br>100.718 cm              |
| CIRCULARITY  | <br>0.028                 | <br>0.864                  | <br>0.039                | <br>0.988                   |
| ROUNDNESS    | <br>0.071                 | <br>0.907                  | <br>0.050                | <br>0.965                   |
| SOLIDITY     | <br>0.363                 | <br>0.989                  | <br>0.223                | <br>0.988                   |
| ASPECT RATIO | <br>1.104                 | <br>14.13                  | <br>1.026                 | <br>20.073                  |

512

513

514 **Figure 1** : Phenotype description obtained using the extended particle analyzer plugin in  
 515 ImageJ: Individual root measurements with the maximum and the minimum value of each  
 516 trait in Genetic gain (GG) population and Cycle1 (C1) population, represented to highlight  
 517 the range of values for each trait.

518

519

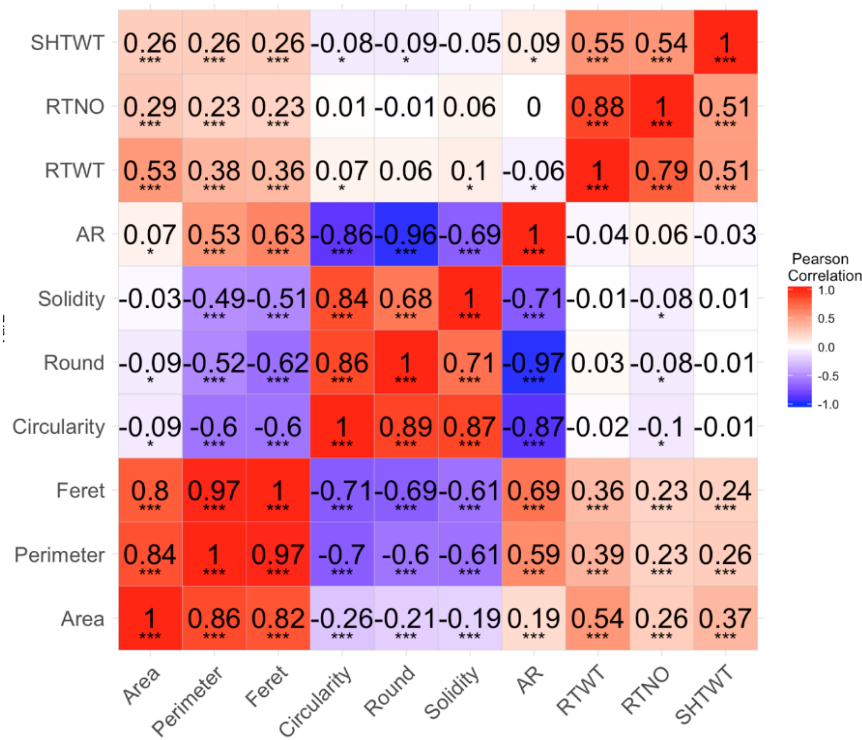

520

521 **Figure 2:** Heatmap with Pearson correlation coefficient: Trait correlation using the de-  
 522 regressed BLUP value of GG dataset (lower triangle) and C1 dataset (upper triangle). The  
 523 stars depict the significance according the p-value (\*\* $P < 0.0001$ , \*\* $P < 0.001$ , \* $P < 0.05$ )

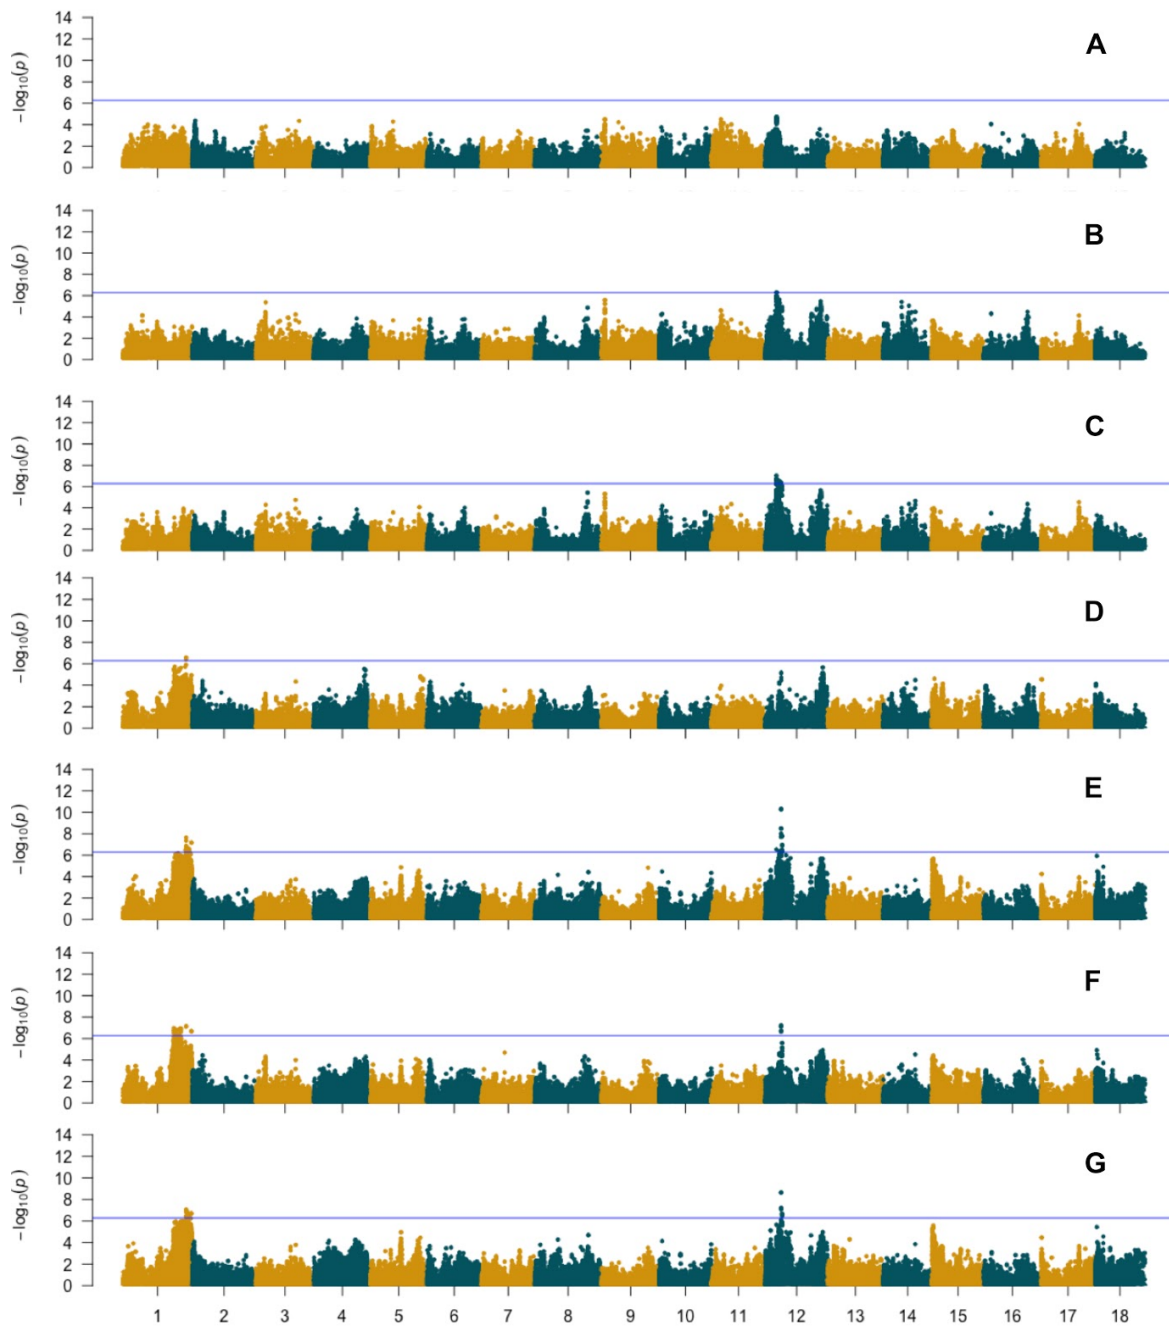

524

525 **Figure 3.** Genome-wide association results of size and shape-related traits using de-regressed  
526 BLUPs of mean values (not corrected for CMD). A. Area; B. Perimeter; C. Feret; D. Solidity;  
527 E. Aspect ratio; F. Circularity; G. Roundness. Blue horizontal line indicates the Bonferroni  
528 statistical threshold.

529

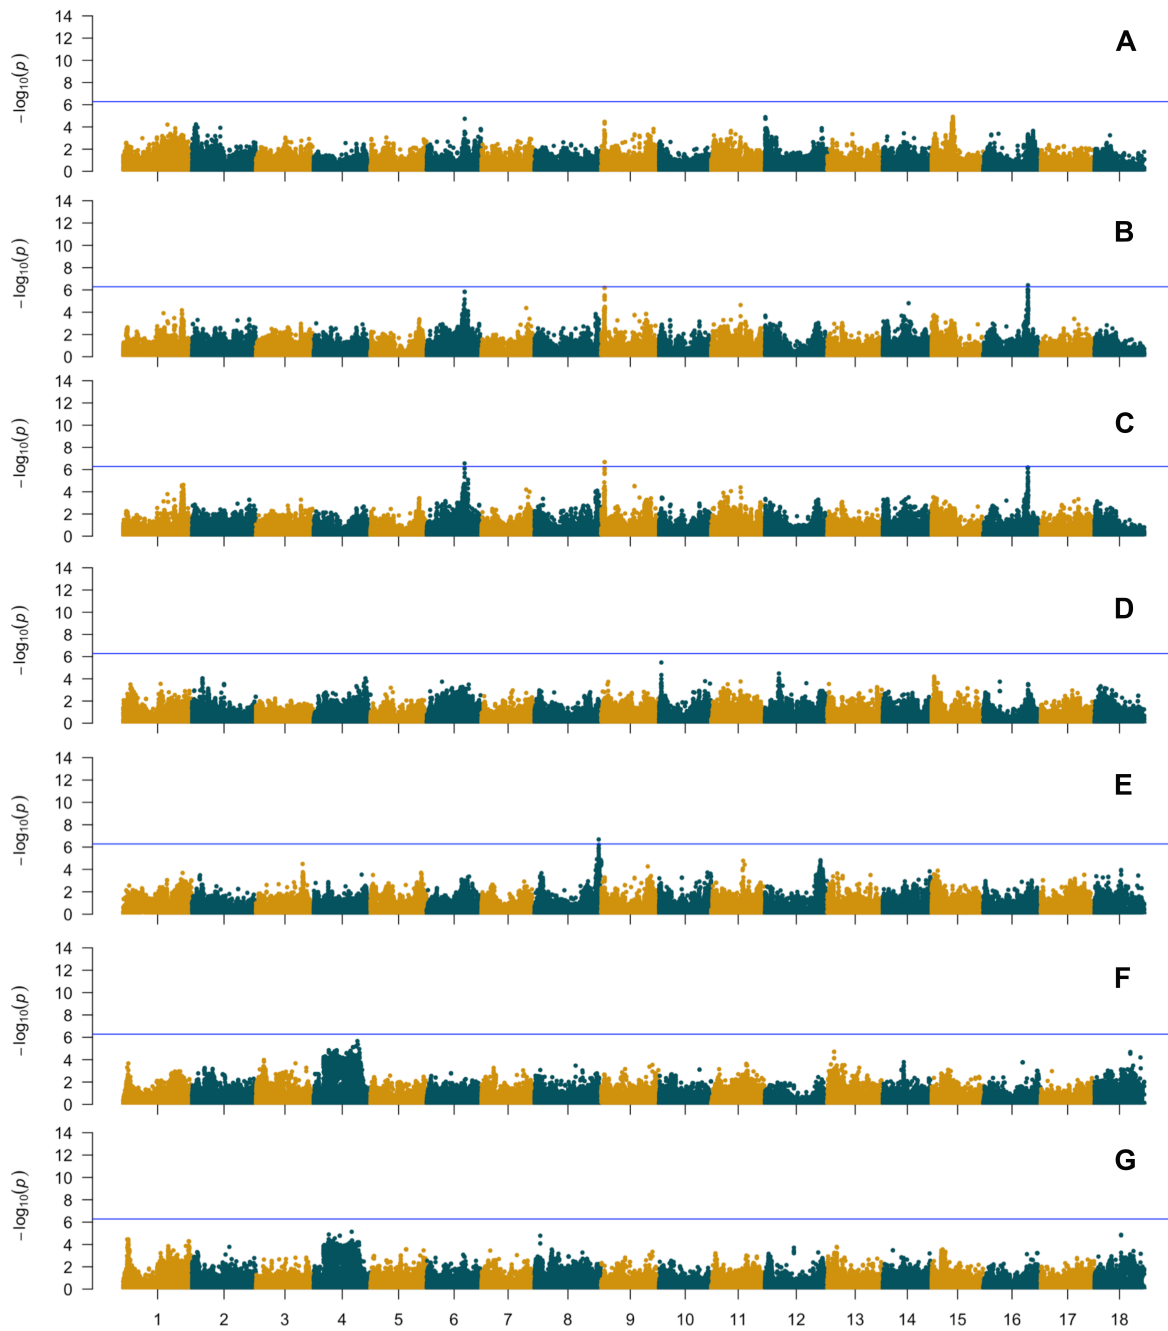

530

531

532 **Figure 4.** Genome-wide association results of standard deviation-derived size and shape-

533 related traits using de-regressed BLUPs of mean CMD-corrected values. A. Area; B.

534 Perimeter; C. Feret; D. Solidity; E. Aspect ratio; F. Circularity; G. Roundness. Blue

535 horizontal line indicates the Bonferroni statistical threshold.

536

537

538

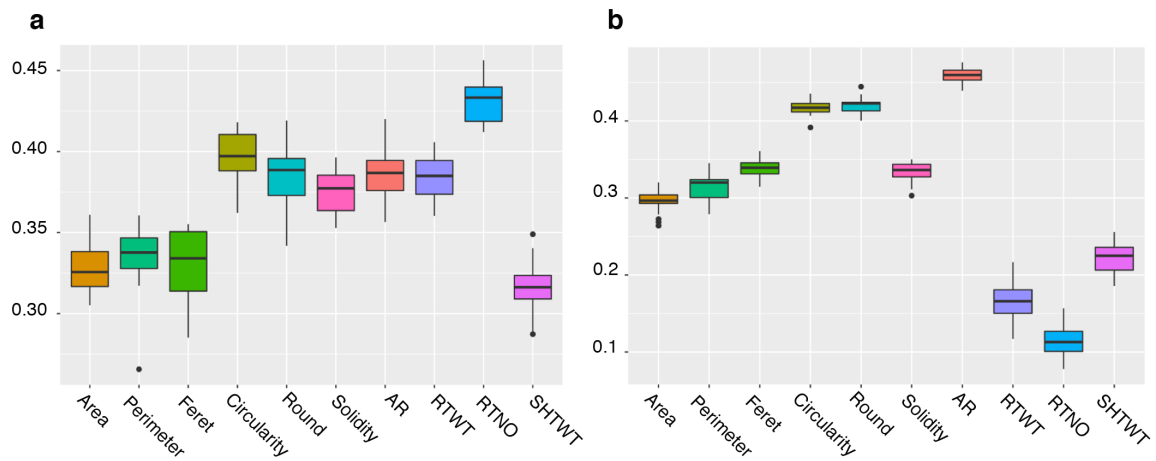

539

540 **Figure 5:** Prediction accuracy of root size and shape and yield traits. Predictive accuracies  
541 were obtained with 5 fold-cross-validation analysis using a GBLUP model in the (a) GG  
542 dataset and in the (b) C1 dataset.

543

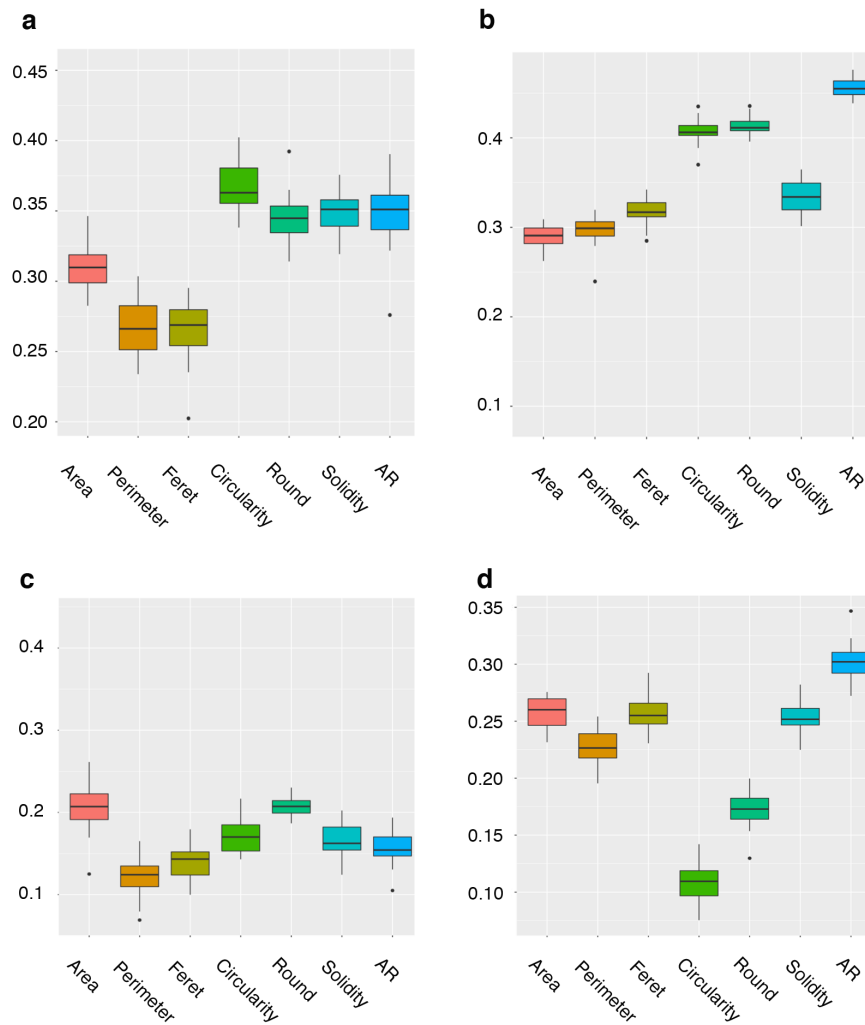

544

545 **Figure 6.** GBLUP model predictive accuracy of root size and shape traits. a) GG population

546 CMD adjusted phenotypes, b) C1 population CMD adjusted phenotypes, c) GG population

547 standard deviation + CMD correction, d) C1 population standard deviation + CMD correction

548

| Trait        | GG            |        | C1            |        |
|--------------|---------------|--------|---------------|--------|
|              | no correction | +MCMDS | no correction | +MCMDS |
| Area         | 0.39          | 0.33   | 0.38          | 0.36   |
| Perimeter    | 0.17          | 0.12   | 0.36          | 0.33   |
| Feret        | 0.33          | 0.17   | 0.40          | 0.35   |
| Circularity  | 0.17          | 0.15   | 0.54          | 0.53   |
| Round        | 0.39          | 0.26   | 0.52          | 0.49   |
| Solidity     | 0.12          | 0.12   | 0.48          | 0.48   |
| Aspect Ratio | 0.46          | 0.31   | 0.56          | 0.54   |
| RTWT         | 0.29          | 0.23   | 0.60          | 0.50   |
| RTNO         | 0.39          | 0.37   | 0.61          | 0.54   |
| SHTWT        | 0.44          | 0.39   | 0.36          | 0.33   |

549

550 **Table 2:** Broad-sense heritability values of root shape and root yield traits for the Genetic  
551 gain and cycle 1 breeding populations. (RTWT: root weight; RTNO: root number; SHTWT:  
552 Shoot weight).

553

#### 554 **Supplementary figures**

555

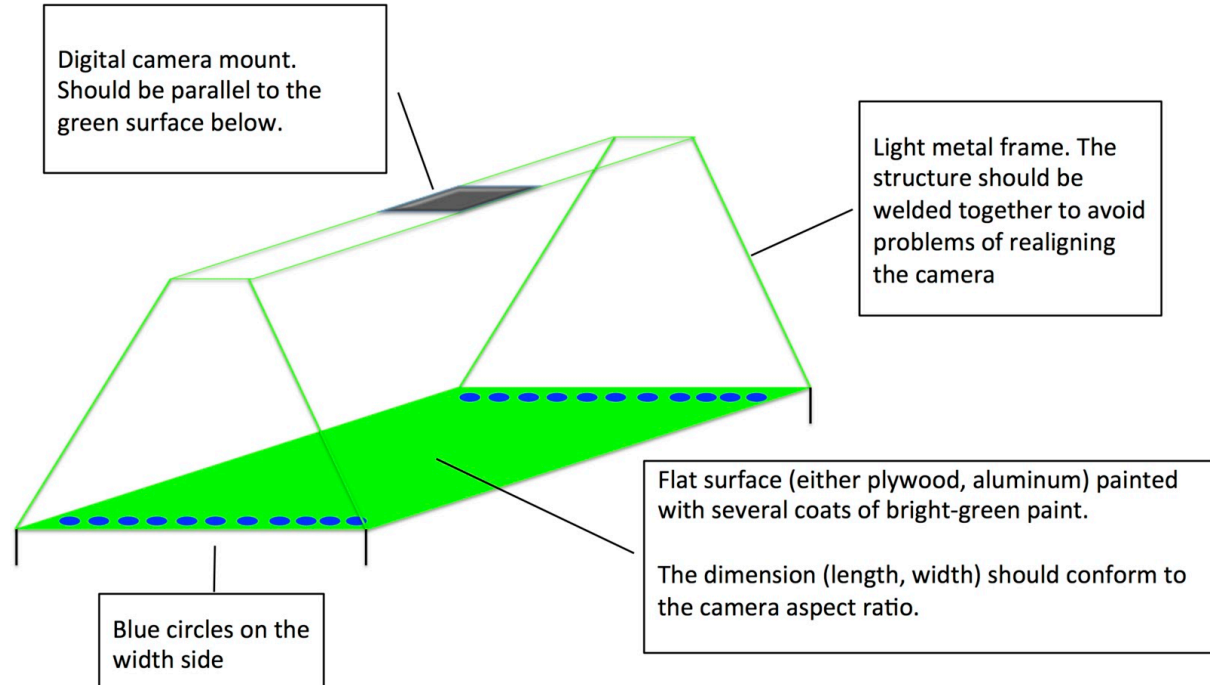

556

557

558 **Supplementary figure 1:** Schematic of the green board used as a background to take  
559 photographs in the field.

560

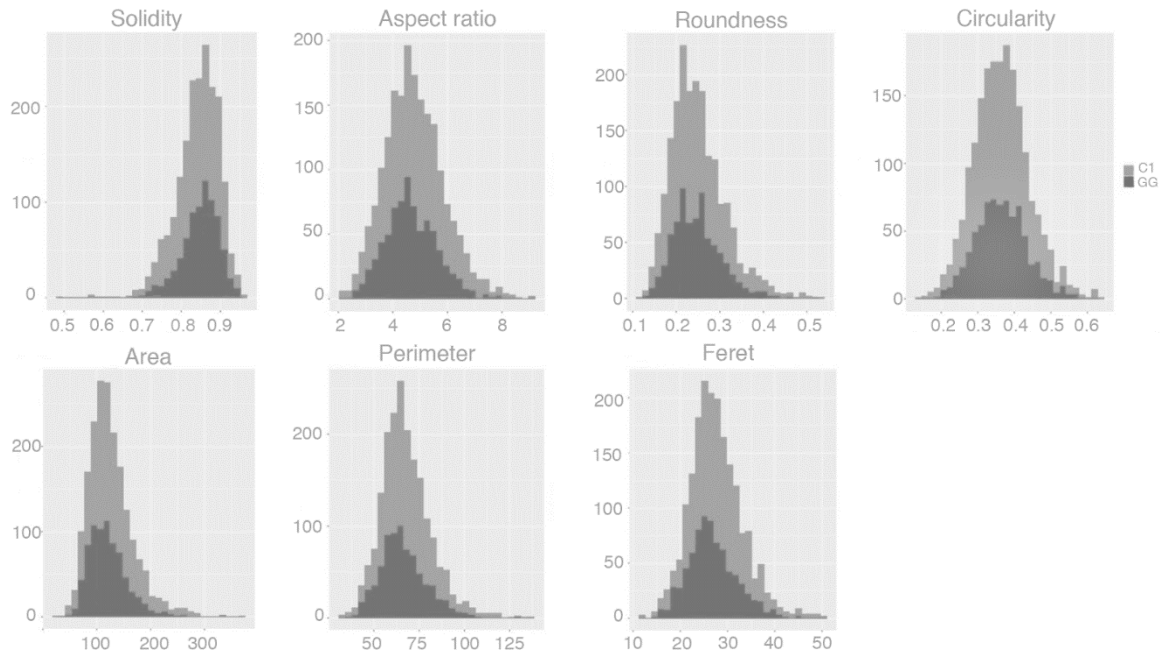

561

562 **Supplementary Figure 2.** Trait distribution of mean root values. Root values of each

563 phenotype extracted from photographs from each genotype were averaged and the

564 distribution plotted. Dark gray: GG, light gray : C1.

565



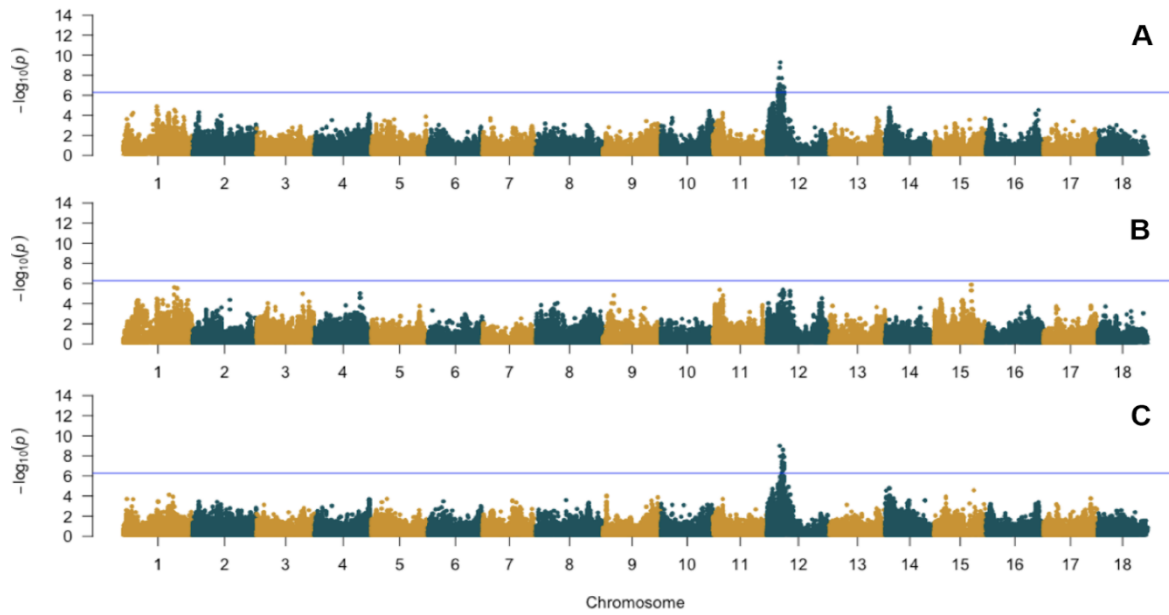

566

567

568 **Supplementary figure 3.** Yield traits GWAS results using the IITA Genetic Gain and Cycle

569 1 breeding populations. Manhattan plots of  $-\log_{10}(P\text{-value})$  of A. Root weight, B. Shoot

570 weight, C. Root number. Blue horizontal line indicate the Bonferroni statistical threshold ( $-\log_{10}(P\text{-value}) > 6.28$ )

571  $\log_{10}(P\text{-value}) > 6.28$ )

572

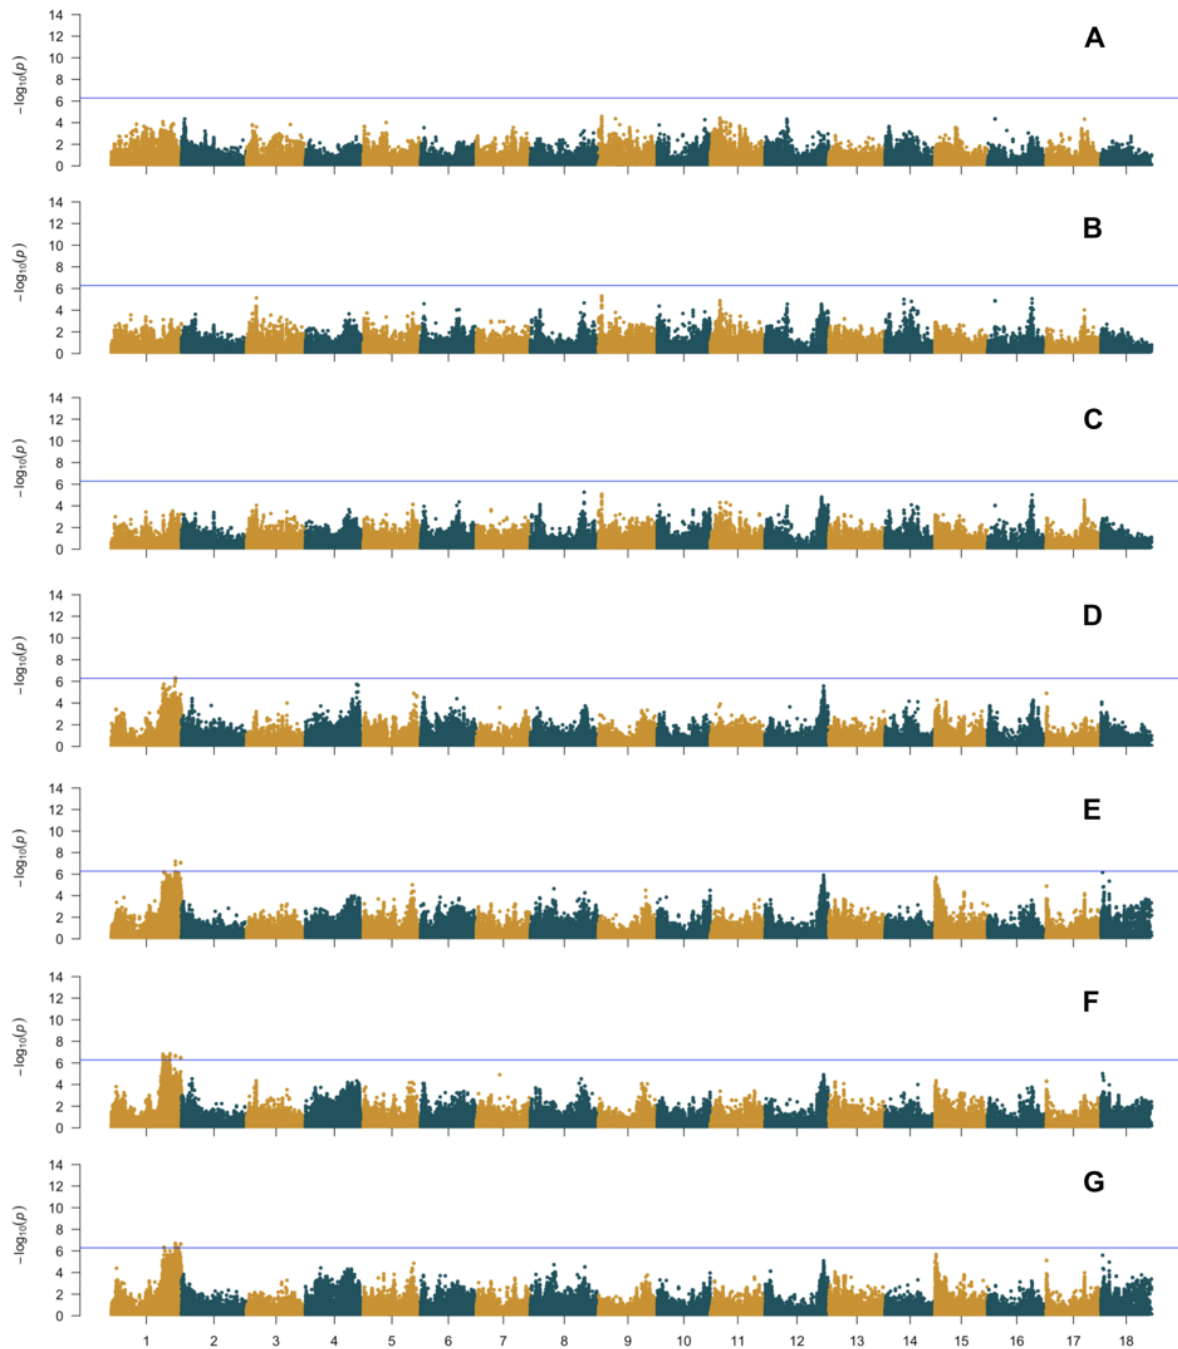

573

574

575 **Supplementary figure 4.** Size and shape GWAS results using the IITA Genetic Gain and

576 Cycle 1 breeding populations using CMD score as a covariate. Manhattan plots of  $-\log_{10}(P$ -

577 value) of A. Area; B. Perimeter; C. Feret; D. Solidity; E. Aspect ratio; F. Circularity; G.

578 Roundness. Blue horizontal line indicates the Bonferroni statistical threshold.

579

580

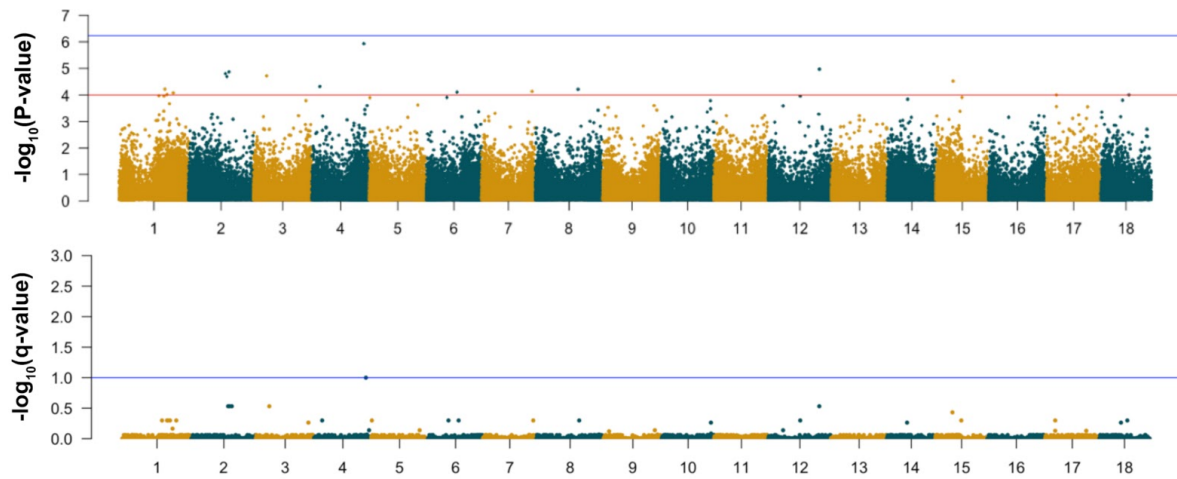

581

582 **Supplementary Figure 5.** Multivariate GWAS of Circularity, Round and Solidity (model 1).

583 Manhattan plots of  $-\log_{10}(\text{P-value})$  (top panel) and  $-\log_{10}(\text{q-value})$  (bottom panel). In the top

584 panel the blue horizontal line indicates the Bonferroni statistical threshold and the red line

585 indicate a  $-\log_{10}(\text{p-value}) = 4$ . In the bottom panel de the blue line indicates the significant

586 threshold of the q-value.

587

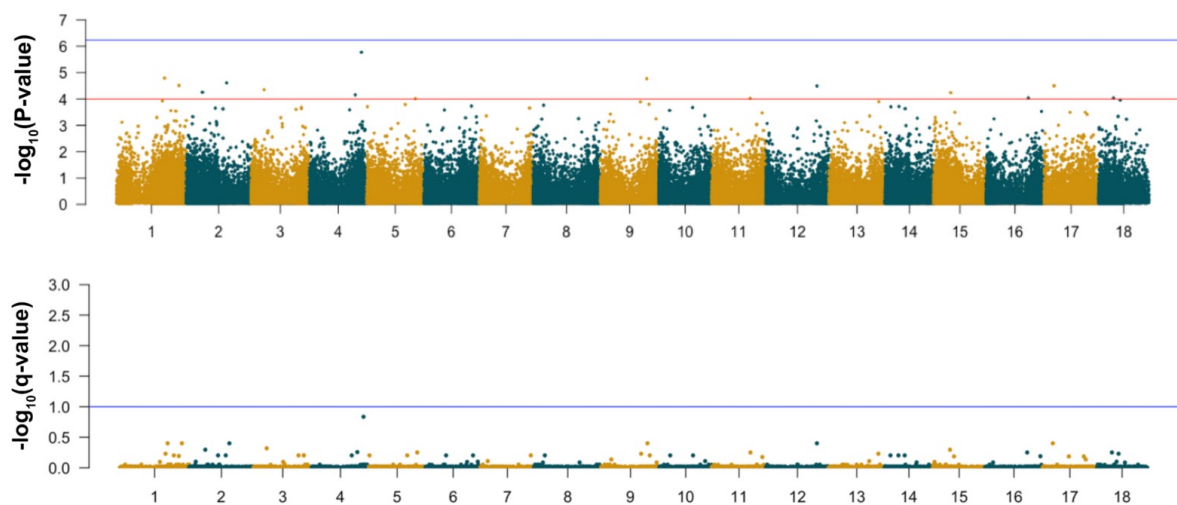

588

589 **Supplementary Figure 6.** Multivariate GWAS of Area, Feret and Circularity (model 2).

590 Manhattan plots of  $-\log_{10}(\text{P-value})$  (top panel) and  $-\log_{10}(\text{q-value})$  (bottom panel). In the top

591 panel the blue horizontal line indicates the Bonferroni statistical threshold and the red line

592 indicate a  $-\log_{10}(\text{p-value}) = 4$ . In the bottom panel de the blue line indicates the significant

593 threshold of the q-value.

594

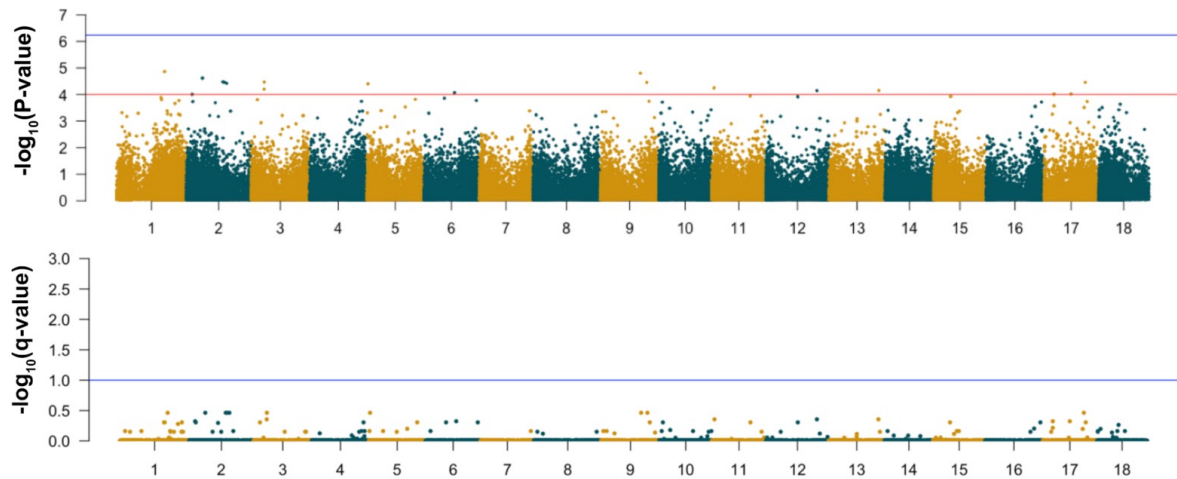

595

596 **Supplementary Figure 7.** Multivariate GWAS of Area, Perimeter, Round, Solidity and AR

597 (model 3). Manhattan plots of  $-\log_{10}(\text{P-value})$  (top panel) and  $-\log_{10}(\text{q-value})$  (bottom panel).

598 In the top panel the blue horizontal line indicates the Bonferroni statistical threshold and the

599 red line indicate a  $-\log_{10}(\text{p-value}) = 4$ . In the bottom panel de the blue line indicates the

600 significant threshold of the q-value.

601

602

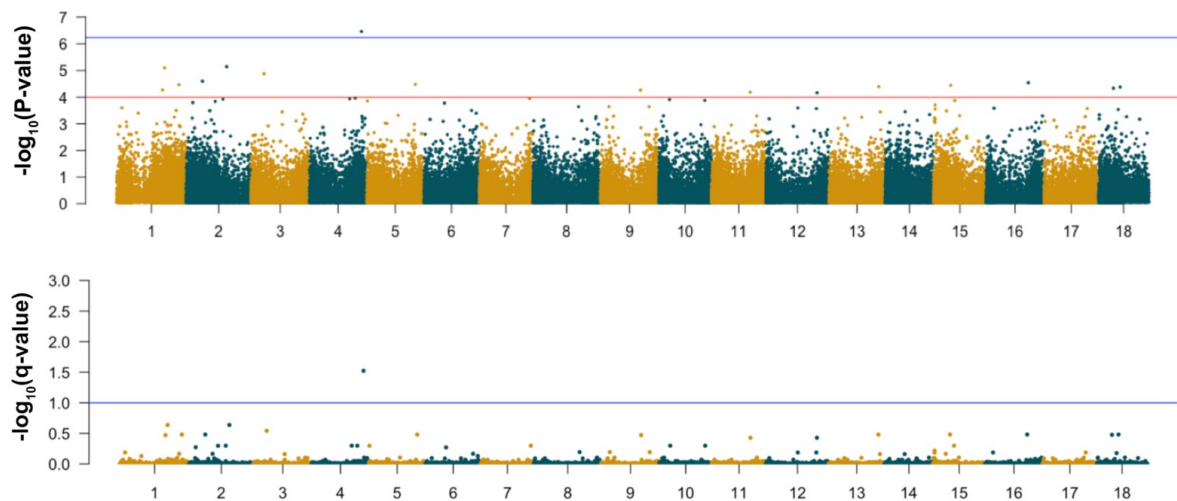

603

604 **Supplementary Figure 8.** Multivariate GWAS of Area, Perimeter, Feret, Circularity, Round,

605 Solidity and AR (Model 4). Manhattan plots of  $-\log_{10}(\text{P-value})$  (top panel) and  $-\log_{10}(\text{q-value})$

606 (bottom panel). In the top panel the blue horizontal line indicates the Bonferroni statistical

607 threshold and the red line indicate a  $-\log_{10}(\text{p-value}) = 4$ . In the bottom panel de the blue line

608 indicates the significant threshold of the q-value.

609

610

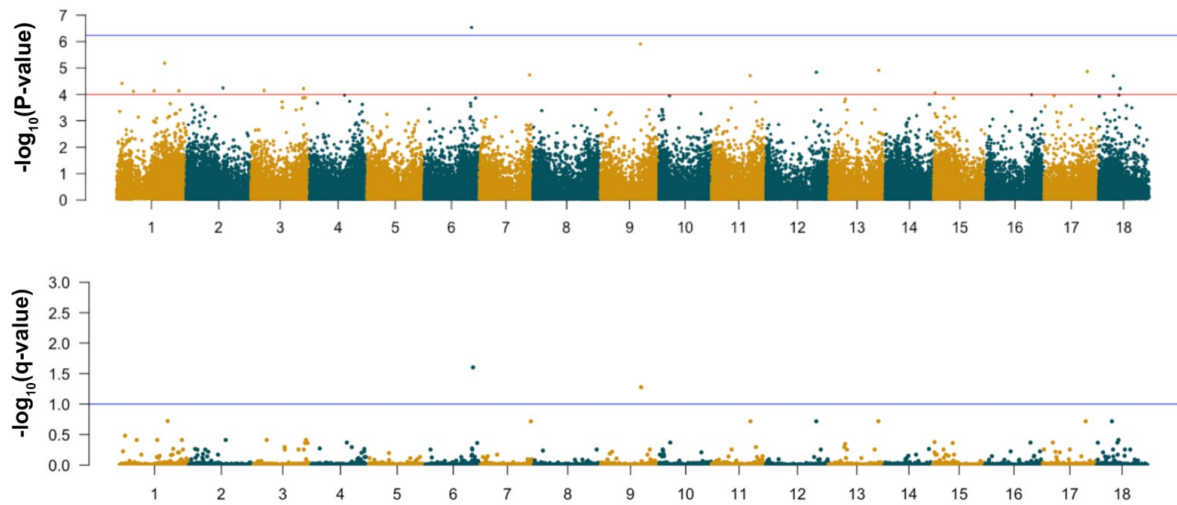

611

612 **Supplementary Figure 9.** Multivariate GWAS of Area, Perimeter and Feret (model 5).

613 Manhattan plots of  $-\log_{10}(\text{P-value})$  (top panel) and  $-\log_{10}(\text{q-value})$  (bottom panel). In the top

614 panel the blue horizontal line indicates the Bonferroni statistical threshold and the red line

615 indicate a  $-\log_{10}(\text{p-value}) = 4$ . In the bottom panel de the blue line indicates the significant

616 threshold of the q-value.

617

618

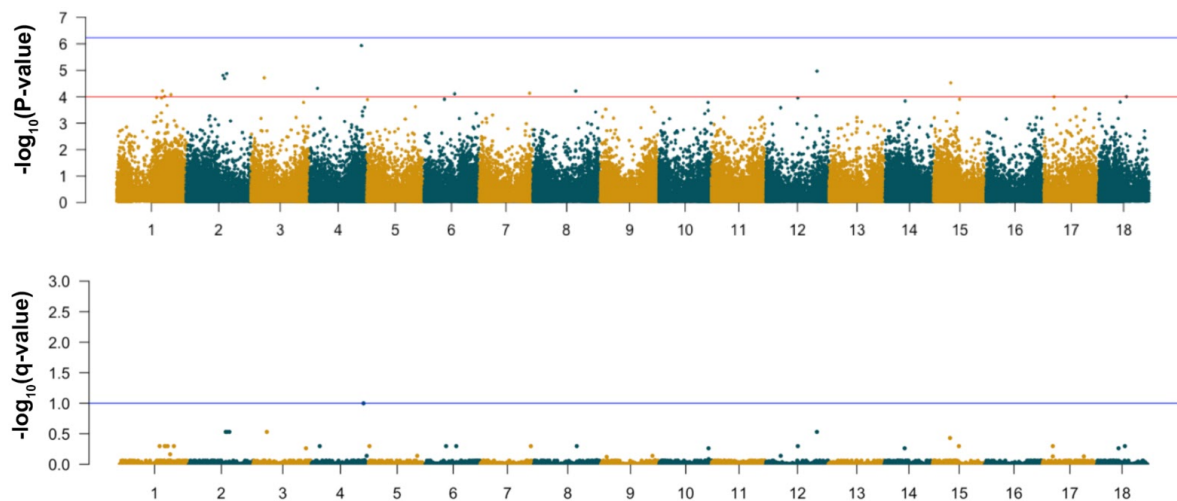

619

620 **Supplementary Figure 10.** Multivariate GWAS of Circularity, Round, Solidity and AR

621 (model 6). Manhattan plots of  $-\log_{10}(\text{P-value})$  (top panel) and  $-\log_{10}(\text{q-value})$  (bottom panel).

622 In the top panel the blue horizontal line indicates the Bonferroni statistical threshold and the

623 red line indicate a  $-\log_{10}(\text{p-value}) = 4$ . In the bottom panel de the blue line indicates the  
624 significant threshold of the q-value.

625

626

627

628

629

630

### 631 **Supplementary tables**

632 **Supplementary table 1.** Mean values of raw and plot shape and size root measurements. The  
633 plot value was calculated as the average of five plants per plot, the raw value was the  
634 individual root value per genotype

635

636 **Supplementary table 2.** GWAS results of image-extracted and yield-related traits. Results in  
637 bold are SNP p-values that surpassed the Bonferroni threshold.

638

639 **Supplementary table 3.** GWAS results of image-extracted and yield-related traits using  
640 CMD adjusted phenotypes. Results in bold are SNP p-values that surpassed the Bonferroni  
641 threshold.

642

643 **Supplementary table 4.** GWAS results of the standard deviation of image-extracted traits  
644 using CMD adjusted phenotypes. Results in bold are SNP p-values that surpassed the  
645 Bonferroni threshold.

646

647 **Supplementary table 5.** Summary results genomic prediction. Input phenotypes: mean  
648 values per genotype/plot, mean adjusted phenotypes (mean + CMD correction), standard  
649 deviation per genotype/plot of adjusted phenotypes (sd + CMD correction).

650

651 **Supplementary table 6.** Candidate gene annotation of significant QTL regions in  
652 chromosomes 6,9 and 16 using the GWAS results of the standard deviation + CMD  
653 correction of root size and shape traits.

654

## 655 **References**

- 656 Adetan, D. A., Adekoya, L. O. and Aluko, O. B. (2003) ‘Characterisation of some properties  
657 of cassava root tubers’, *J. Food Eng.*, 59(4), pp. 349–353. doi: 10.1016/s0260-  
658 8774(02)00493-4.
- 659 Akdemir, D. and Okeke, U. G. (2015) ‘EMMREML: Fitting Mixed Models with Known  
660 Covariance Structures’, [https://cran.r-project.org/package=EMMREML.](https://cran.r-project.org/package=EMMREML), p. R package  
661 version 3.1.
- 662 Alves, A. A. C. (2002) ‘Cassava botany and physiology’, in *Cassava: biology, production  
663 and utilization*. CAB international, pp. 67–89. doi: 10.1079/9780851995243.0067.
- 664 Anggraini, V. *et al.* (2009) ‘Characterization of Cassava Starch Attributes of Different  
665 Genotypes’, *Starch - Stärke*, 61(8), pp. 472–481. doi: 10.1002/star.200800121.
- 666 Bredeson, J. V *et al.* (2016) ‘Sequencing wild and cultivated cassava and related species  
667 reveals extensive interspecific hybridization and genetic diversity.’, *Nature biotechnology*,  
668 34(5), pp. 562–570. doi: 10.1038/nbt.3535.
- 669 Browning, B. L. and Browning, S. R. (2016) ‘Genotype Imputation with Millions of  
670 Reference Samples’, *American Journal of Human Genetics*, 98(1), pp. 116–126. doi:  
671 10.1016/j.ajhg.2015.11.020.
- 672 Colombi, T. *et al.* (2015) ‘Next generation shovelomics: set up a tent and REST’, *Plant Soil*,  
673 388(1–2), pp. 1–20. doi: 10.1007/s11104-015-2379-7.
- 674 Ejovo N. Ohwovoriole *et al.* (1988) ‘Studies and Preliminary Design for a Cassava Tuber  
675 Peeling Machine’, *Trans. ASAE*, 31(2), pp. 380–385. doi: 10.13031/2013.30718.
- 676 Elshire, R. J. *et al.* (2011) ‘A robust, simple genotyping-by-sequencing (GBS) approach for  
677 high diversity species.’, *PloS one*, 6(5), p. e19379. doi: 10.1371/journal.pone.0019379.
- 678 Endelman, J. B. (2011) ‘Ridge Regression and Other Kernels for Genomic Selection with R  
679 Package rrBLUP’, *The Plant Genome Journal*, 4(3), p. 250. doi:  
680 10.3835/plantgenome2011.08.0024.
- 681 Endelman, J. B. and Jannink, J.-L. (2012) ‘Shrinkage Estimation of the Realized Relationship  
682 Matrix’, *G3: Genes|Genomes|Genetics*, 2(11), pp. 1405–1413. doi: 10.1534/g3.112.004259.
- 683 Fahlgren, N., Gehan, M. A. and Baxter, I. (2015) ‘Lights, camera, action: High-throughput  
684 plant phenotyping is ready for a close-up’, *Current Opinion in Plant Biology*, pp. 93–99. doi:  
685 10.1016/j.pbi.2015.02.006.
- 686 Furbank, R. T. and Tester, M. (2011) ‘Phenomics--technologies to relieve the phenotyping  
687 bottleneck’, *Trends Plant Sci.*, 16(12), pp. 635–644. doi: 10.1016/j.tplants.2011.09.005.

- 688 Glaubitz, J. C. *et al.* (2014) ‘TASSEL-GBS: a high capacity genotyping by sequencing  
689 analysis pipeline.’, *PLoS one*, 9(2), p. e90346. doi: 10.1371/journal.pone.0090346.
- 690 Guira, F. *et al.* (2017) ‘Origins, production, and utilization of cassava in Burkina Faso, a  
691 contribution of a neglected crop to household food security’, *Food Sci Nutr*, 5(3), pp. 415–  
692 423. doi: 10.1002/fsn3.408.
- 693 Hahn, S. K., Reynolds, L. and Egbunike, G. N. (1992) *Cassava as Livestock Feed in Africa:  
694 Proceedings of the IITA/ILCA/University of Ibadan Workshop on the Potential Utilization of  
695 Cassava as Livestock Feed in Africa : 14-18 November 1988, Ibadan, Nigeria*. IITA.  
696 Available at:  
697 [https://books.google.com/books/about/Cassava\\_as\\_Livestock\\_Feed\\_in\\_Africa.html?hl=&id=](https://books.google.com/books/about/Cassava_as_Livestock_Feed_in_Africa.html?hl=&id=S4MRm7Z-evEC_LB_-eQLQ)  
698 [S4MRm7Z-evEC\\_LB\\_-eQLQ](https://books.google.com/books/about/Cassava_as_Livestock_Feed_in_Africa.html?hl=&id=S4MRm7Z-evEC_LB_-eQLQ).
- 699 Hartmann, A. *et al.* (2011) ‘HTPheno: an image analysis pipeline for high-throughput plant  
700 phenotyping.’, *BMC bioinformatics*, 12(1), p. 148. doi: 10.1186/1471-2105-12-148.
- 701 Heffner, E. L., Sorrells, M. E. and Jannink, J.-L. (2009) ‘Genomic Selection for Crop  
702 Improvement’, *Crop Science*, 49(1), p. 1. doi: 10.2135/cropsci2008.08.0512.
- 703 Howeler, R. H. *et al.* (2013) *Save and Grow: Cassava : a Guide to Sustainable Production  
704 Intensification*. Food & Agriculture Org. Available at:  
705 [https://books.google.com/books/about/Save\\_and\\_Grow.html?hl=&id=XrxJngEACAAJ\\_LB\\_-](https://books.google.com/books/about/Save_and_Grow.html?hl=&id=XrxJngEACAAJ_LB_-A2k8)  
706 [A2k8](https://books.google.com/books/about/Save_and_Grow.html?hl=&id=XrxJngEACAAJ_LB_-A2k8).
- 707 Iwata, H. *et al.* (2000) ‘Diallel Analysis of Root Shape of Japanese Radish (*Raphanus sativus*  
708 L.) Based on Elliptic Fourier Descriptors’, *Breed. Sci.*, 50(2), pp. 73–80. doi:  
709 10.1270/jsbbs.50.73.
- 710 Iwata, H. *et al.* (2015a) ‘Genome-wide Association Study of Biological Shape Based on  
711 Elliptic Fourier Analysis: A Case Study in Rice Grain Shape Variation’, *Biological Shape  
712 Analysis*. doi: 10.1142/9789814704199\_0007.
- 713 Iwata, H. *et al.* (2015b) ‘Genomic Prediction of Biological Shape: Elliptic Fourier Analysis  
714 and Kernel Partial Least Squares (PLS) Regression Applied to Grain Shape Prediction in  
715 Rice (*Oryza sativa* L.)’, *PLoS One*, 10(3), p. e0120610. doi: 10.1371/journal.pone.0120610.
- 716 Jannink, J.-L. L., Lorenz, A. J. and Iwata, H. (2010) ‘Genomic selection in plant breeding:  
717 from theory to practice’, *Briefings in Functional Genomics*, 9(2), pp. 166–177. doi:  
718 10.1093/bfpg/elq001.
- 719 Kayondo, S. I. *et al.* (2018) ‘Genome-wide association mapping and genomic prediction for  
720 CBSD resistance in *Manihot esculenta*’, *Sci. Rep.*, 8(1), p. 1549. doi: 10.1038/s41598-018-  
721 19696-1.



- 722 Korol, A. B. *et al.* (2001) ‘Enhanced efficiency of quantitative trait loci mapping analysis  
723 based on multivariate complexes of quantitative traits’, *Genetics*, 157(4), pp. 1789–1803.  
724 Available at: <https://www.ncbi.nlm.nih.gov/pubmed/11290731>.
- 725 Korte, A. *et al.* (2012) ‘A mixed-model approach for genome-wide association studies of  
726 correlated traits in structured populations’, *Nat. Genet.*, 44(9), pp. 1066–1071. doi:  
727 10.1038/ng.2376.
- 728 Lestrel, P. E. (2011) *Biological Shape Analysis: Proceedings of the 1st International*  
729 *Symposium, Tsukuba, Japan, 3-6 June 2009*. World Scientific. Available at:  
730 [https://books.google.com/books/about/Biological\\_Shape\\_Analysis.html?hl=&id=i2w1cZNJc](https://books.google.com/books/about/Biological_Shape_Analysis.html?hl=&id=i2w1cZNJc)  
731 UcC LB - qwes.
- 732 Lukuyu, B. *et al.* (2014) *Use of cassava in livestock and aquaculture feeding programs*. ILRI  
733 (aka ILCA and ILRAD). Available at:  
734 [https://books.google.com/books/about/Use\\_of\\_cassava\\_in\\_livestock\\_and\\_aquacult.html?hl=](https://books.google.com/books/about/Use_of_cassava_in_livestock_and_aquacult.html?hl=&id=ZGdhBAAAQBAJ)  
735 [&id=ZGdhBAAAQBAJ](https://books.google.com/books/about/Use_of_cassava_in_livestock_and_aquacult.html?hl=&id=ZGdhBAAAQBAJ) LB - 3cJk.
- 736 Nisar, N. *et al.* (2015) ‘Carotenoid metabolism in plants’, *Molecular Plant*. doi:  
737 10.1016/j.molp.2014.12.007.
- 738 Onwueme, I. C. (1978) *The Tropical Tuber Crops: Yams, Cassava, Sweet Potato, and*  
739 *Cocoyams*. John Wiley & Sons. Available at:  
740 [https://books.google.com/books/about/The\\_Tropical\\_Tuber\\_Crops.html?hl=&id=WRFIAAA](https://books.google.com/books/about/The_Tropical_Tuber_Crops.html?hl=&id=WRFIAAA)  
741 AYAAJ LB - XYe9.
- 742 Otim-Nape, G. W., Thresh, J. M. and Shaw, M. W. (1997) ‘The effects of cassava mosaic  
743 virus disease on yield and compensation in mixed stands of healthy and infected cassava’,  
744 *Ann. Appl. Biol.*, 130(3), pp. 503–521. doi: 10.1111/j.1744-7348.1997.tb07678.x.
- 745 Owor, B. *et al.* (2004) ‘The effect of cassava mosaic geminiviruses on symptom severity,  
746 growth and root yield of a cassava mosaic virus disease-susceptible cultivar in Uganda’, *Ann.*  
747 *Appl. Biol.*, 145(3), pp. 331–337. doi: 10.1111/j.1744-7348.2004.tb00390.x.
- 748 Padonou, W., Mestres, C. and Nago, M. C. (2005) ‘The quality of boiled cassava roots:  
749 instrumental characterization and relationship with physicochemical properties and sensorial  
750 properties’, *Food Chem.*, 89(2), pp. 261–270. doi: 10.1016/j.foodchem.2004.02.033.
- 751 Rabbi, I. Y. *et al.* (2017) ‘Genome-Wide Association Mapping of Correlated Traits in  
752 Cassava: Dry Matter and Total Carotenoid Content’, *The Plant Genome*, 10(0), p. doi:  
753 10.3835/plantgenome2016.09.0094. doi: 10.3835/plantgenome2016.09.0094.
- 754 Seif, A. A. (1982) ‘Effect of Cassava Mosaic Virus on Yield of Cassava’, *Plant Dis.*, 66(1),  
755 p. 661. doi: 10.1094/pd-66-661.

756 Turner, S. D. (2014) ‘qqman: an R package for visualizing GWAS results using Q-Q and  
757 manhattan plots’, *bioRxiv*, p. doi : 10.1101/005165.

758 Wolfe, M. D. *et al.* (2016) ‘Genome-wide association and prediction reveals the genetic  
759 architecture of cassava mosaic disease resistance and prospects for rapid genetic  
760 improvement’, *Plant Genome*, 9(2), pp. 1–13. doi: 10.3835/plantgenome2015.11.0118.

761 Wolfe, Marnin D. *et al.* (2017) ‘Prospects for genomic selection in cassava breeding’, *The*  
762 *Plant Genome*, 10(3), p. 10.3835/plantgenome2017.03.0015. Available at:  
763 <http://dx.doi.org/10.3835/plantgenome2017.03.0015>.

764 Wolfe, Marnin D *et al.* (2017) ‘Prospects for Genomic Selection in Cassava Breeding’, *Plant*  
765 *Genome*, 10(3). doi: 10.3835/plantgenome2017.03.0015.

766 Yang, J. *et al.* (2011) ‘GCTA: A tool for genome-wide complex trait analysis’, *American*  
767 *Journal of Human Genetics*, 88(1), pp. 76–82. doi: 10.1016/j.ajhg.2010.11.011.

768 Zhou, X. and Stephens, M. (2014) ‘Efficient multivariate linear mixed model algorithms for  
769 genome-wide association studies.’, *Nature methods*, 11(4), pp. 407–9. doi:  
770 10.1038/nmeth.2848.

771

772

773
